# Supplementary material for: Identification and Analysis of Differentially-Expressed microRNAs in Japanese Encephalitis Virus-Infected PK-15 Cells with Deep Sequencing
Source: MDPI journal article supplement (doi:10.3390/ijms16012204), 2015-01-20
Supplement: s1 [file s1]

# Supplementary Information

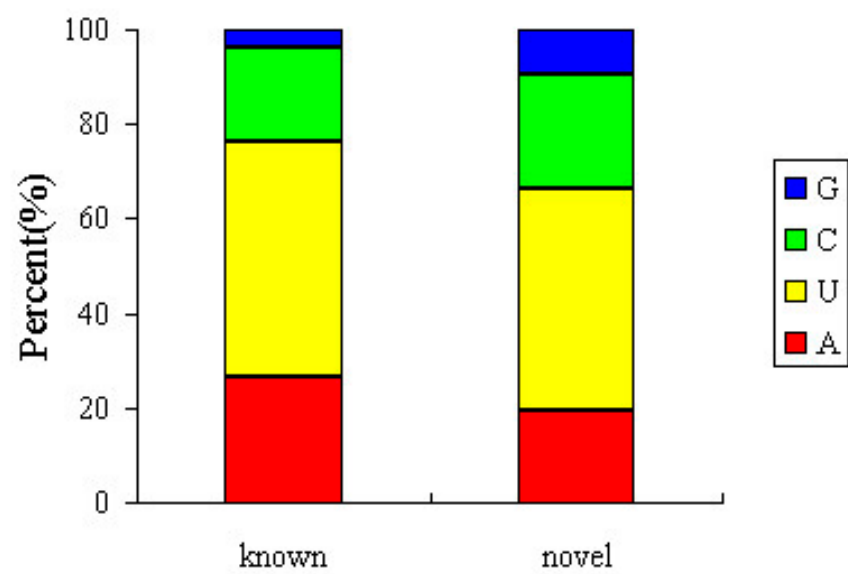

**Figure S1.** First-nucleotide bias in known and novel miRNAs.

**Table S2.** Differentially expressed miRNAs in JEV-infected PK-15 cells.

| miRNA           | Reads in Libraries |            | Fold Change | miRNA           | Reads in Libraries |            | Fold Change |
|-----------------|--------------------|------------|-------------|-----------------|--------------------|------------|-------------|
|                 | Infected           | Uninfected |             |                 | Infected           | Uninfected |             |
| Up-Regulated    |                    |            |             | Down-Regulated  |                    |            |             |
| ssc-let-7d-3p   | 112                | 8          | 6.78        | ssc-let-7d-5p   | 376                | 1773       | 4.62        |
| ssc-miR-1       | 560                | 61         | 8.03        | ssc-miR-1285    | 3                  | 27         | 2.85        |
| ssc-miR-101     | 2701               | 484        | 5.49        | ssc-miR-143-3p  | 7                  | 92         | 6           |
| ssc-miR-103     | 1515               | 697        | 2.16        | ssc-miR-145-5p  | 6                  | 87         | 6.06        |
| ssc-miR-10a-5p  | 8141               | 3471       | 2.34        | ssc-miR-155-5p  | 25                 | 62         | 2.06        |
| ssc-miR-10a-3p  | 285                | 63         | 4.04        | ssc-miR-15a     | 48                 | 156        | 2.91        |
| ssc-miR-10b     | 2986               | 1162       | 2.56        | ssc-miR-15b     | 54                 | 812        | 12.84       |
| ssc-miR-122     | 114                | 10         | 6.2         | ssc-miR-17-3p   | 0                  | 15         | 2.5         |
| ssc-miR-125b    | 3230               | 582        | 5.47        | ssc-miR-185     | 372                | 1621       | 4.27        |
| ssc-miR-126-5p  | 56                 | 2          | 5.5         | ssc-miR-18a     | 76                 | 9541       | 111.06      |
| ssc-miR-1271    | 23                 | 5          | 2.2         | ssc-miR-194b-5p | 3                  | 27         | 2.85        |
| ssc-miR-128     | 1275               | 248        | 4.98        | ssc-miR-195     | 45                 | 192        | 3.67        |
| ssc-miR-129b    | 273                | 72         | 3.45        | ssc-miR-19a     | 2590               | 6339       | 2.44        |
| ssc-miR-135     | 622                | 235        | 2.58        | ssc-miR-215     | 2                  | 31         | 3.42        |
| ssc-miR-140-3p  | 2220               | 1026       | 2.15        | ssc-miR-2320-5p | 50                 | 114        | 2.07        |
| ssc-miR-142-5p  | 50                 | 17         | 2.22        | ssc-miR-24-3p   | 286                | 10,251     | 34.67       |
| ssc-miR-148b-5p | 20                 | 5          | 2           | ssc-miR-27b-5p  | 17                 | 63         | 2.7         |
| ssc-miR-181a    | 563                | 147        | 3.65        | ssc-miR-28-5p   | 82                 | 232        | 2.63        |
| ssc-miR-181b    | 349                | 125        | 2.66        | ssc-miR-301     | 0                  | 17         | 2.7         |
| ssc-miR-184     | 1474               | 359        | 4.02        | ssc-miR-331-3p  | 6                  | 27         | 2.31        |
| ssc-miR-186     | 476                | 113        | 3.95        | ssc-miR-361-5p  | 252                | 704        | 2.73        |
| ssc-miR-192     | 609                | 102        | 5.53        | ssc-miR-369     | 0                  | 11         | 2.1         |
| ssc-miR-194a    | 2350               | 541        | 4.28        | ssc-miR-421-3p  | 3                  | 38         | 3.7         |
| ssc-miR-196b    | 2135               | 984        | 2.16        | ssc-miR-423-5p  | 845                | 2493       | 2.93        |

Table S2. *Cont.*

| miRNA             | Reads in Libraries |            | Fold Change | miRNA             | Reads in Libraries |            | Fold Change |
|-------------------|--------------------|------------|-------------|-------------------|--------------------|------------|-------------|
|                   | Infected           | Uninfected |             |                   | Infected           | Uninfected |             |
| Up-Regulated      |                    |            |             | Down-Regulated    |                    |            |             |
| ssc-miR-210       | 383                | 123        | 2.95        | ssc-miR-499-5p    | 47                 | 472        | 8.46        |
| ssc-miR-221-3p    | 1292               | 147        | 8.29        | ssc-miR-505       | 32                 | 79         | 2.12        |
| ssc-miR-222       | 1421               | 284        | 4.87        | ssc-miR-542-3p    | 453                | 1446       | 3.14        |
| ssc-miR-2483      | 44                 | 13         | 2.35        | ssc-miR-98        | 466                | 2376       | 5.01        |
| ssc-miR-26a       | 7323               | 3198       | 2.29        | ssc-miR-novel-4   | 3                  | 52         | 4.77        |
| ssc-miR-29a       | 10,955             | 3939       | 2.78        | ssc-miR-novel-10  | 1                  | 547        | 50.64       |
| ssc-miR-29c       | 816                | 366        | 2.2         | ssc-miR-novel-17  | 0                  | 47         | 5.7         |
| ssc-miR-30a-5p    | 14,296             | 6320       | 2.26        | ssc-miR-novel-19  | 1                  | 14         | 2.18        |
| ssc-miR-30c-5p    | 523                | 209        | 2.43        | ssc-miR-novel-61  | 8                  | 99         | 6.06        |
| ssc-miR-30c-3p    | 318                | 36         | 7.13        | ssc-miR-novel-69  | 23                 | 58         | 2.06        |
| ssc-miR-30e-5p    | 2325               | 812        | 2.84        | ssc-miR-novel-73  | 2                  | 24         | 2.83        |
| ssc-miR-32        | 284                | 79         | 3.3         | ssc-miR-novel-99  | 5                  | 80         | 6           |
| ssc-miR-323       | 18                 | 1          | 2.55        | ssc-miR-novel-116 | 22                 | 57         | 2.09        |
| ssc-miR-374a-5p   | 1212               | 72         | 14.9        | ssc-miR-novel-132 | 3                  | 19         | 2.23        |
| ssc-miR-374b-5p   | 26                 | 6          | 2.25        | ssc-miR-novel-133 | 4                  | 30         | 2.86        |
| ssc-miR-378       | 2697               | 927        | 2.89        | ssc-miR-novel-134 | 136                | 362        | 2.55        |
| ssc-miR-383       | 113                | 38         | 2.56        | ssc-miR-novel-135 | 7                  | 92         | 6           |
| ssc-miR-411       | 107                | 8          | 6.5         | ssc-miR-novel-150 | 4                  | 30         | 2.86        |
| ssc-miR-425-5p    | 3613               | 438        | 8.09        | ssc-miR-novel-177 | 1                  | 58         | 6.18        |
| ssc-miR-429       | 768                | 130        | 5.56        | ssc-miR-novel-193 | 3                  | 34         | 3.38        |
| ssc-miR-4331      | 25                 | 2          | 2.92        | ssc-miR-novel-200 | 25                 | 199        | 5.97        |
| ssc-miR-450a      | 228                | 5          | 15.87       | ssc-miR-novel-202 | 0                  | 736        | 74.37       |
| ssc-miR-450b-5p   | 182                | 40         | 3.84        | ssc-miR-novel-212 | 1                  | 51         | 5.55        |
| ssc-miR-450c-5p   | 227                | 6          | 14.81       | ssc-miR-novel-217 | 1                  | 16         | 2.36        |
| ssc-miR-455-5p    | 17                 | 3          | 2.08        | ssc-miR-novel-218 | 3                  | 150        | 12.31       |
| ssc-miR-486       | 60                 | 8          | 3.89        | ssc-miR-novel-220 | 1                  | 25         | 3.18        |
| ssc-miR-489       | 522                | 158        | 3.17        | ssc-miR-novel-227 | 0                  | 28         | 3.8         |
| ssc-miR-490       | 149                | 24         | 4.68        | ssc-miR-novel-266 | 11                 | 171        | 8.62        |
| ssc-miR-628       | 38                 | 3          | 3.69        | ssc-miR-novel-269 | 37                 | 424        | 9.23        |
| ssc-miR-708-5p    | 41                 | 9          | 2.84        | ssc-miR-novel-280 | 1                  | 20         | 2.73        |
| ssc-miR-744       | 102                | 42         | 2.15        | Down-regulated    | 376                | 1773       | 4.62        |
| ssc-miR-769-5p    | 176                | 55         | 2.86        | ssc-let-7d-5p     | 3                  | 27         | 2.85        |
| ssc-miR-99a       | 2165               | 307        | 6.86        | ssc-miR-1285      | 7                  | 92         | 6           |
| ssc-miR-99b       | 400                | 232        | 2.89        | ssc-miR-143-3p    | 6                  | 87         | 6.06        |
| ssc-miR-novel-36  | 37                 | 12         | 2.14        | ssc-miR-145-5p    | 25                 | 62         | 2.06        |
| ssc-miR-novel-43  | 3879               | 1483       | 2.6         | ssc-miR-155-5p    | 48                 | 156        | 2.91        |
| ssc-miR-novel-58  | 25                 | 5          | 2.33        | ssc-miR-15a       | 54                 | 812        | 12.84       |
| ssc-miR-novel-66  | 82                 | 9          | 4.84        | ssc-miR-15b       | 0                  | 15         | 2.5         |
| ssc-miR-novel-75  | 36                 | 0          | 4.6         | ssc-miR-17-3p     | 372                | 1621       | 4.27        |
| ssc-miR-novel-76  | 192                | 83         | 2.17        | ssc-miR-185       | 76                 | 9541       | 111.06      |
| ssc-miR-novel-153 | 110                | 17         | 4.44        | ssc-miR-18a       | 3                  | 27         | 2.85        |
| ssc-miR-novel-196 | 24                 | 7          | 2           | ssc-miR-194b-5p   | 45                 | 192        | 3.67        |

Table S2. *Cont.*

| miRNA             | Reads in Libraries |            | Fold Change | miRNA             | Reads in Libraries |            | Fold Change |
|-------------------|--------------------|------------|-------------|-------------------|--------------------|------------|-------------|
|                   | Infected           | Uninfected |             |                   | Infected           | Uninfected |             |
| Up-Regulated      |                    |            |             | Down-Regulated    |                    |            |             |
| ssc-miR-novel-199 | 2694               | 354        | 7.43        | ssc-miR-195       | 2590               | 6339       | 2.44        |
| ssc-miR-novel-209 | 5027               | 1317       | 3.8         | ssc-miR-19a       | 2                  | 31         | 3.42        |
| ssc-miR-novel-211 | 106                | 9          | 6.11        | ssc-miR-215       | 50                 | 114        | 2.07        |
| ssc-miR-novel-261 | 195                | 40         | 4.1         | ssc-miR-2320-5p   | 286                | 10,251     | 34.67       |
| ssc-miR-novel-268 | 239                | 89         | 2.52        | ssc-miR-24-3p     | 17                 | 63         | 2.7         |
| ssc-miR-novel-274 | 203                | 69         | 2.7         | ssc-miR-27b-5p    | 82                 | 232        | 2.63        |
| ssc-miR-novel-281 | 1292               | 147        | 8.29        | ssc-miR-28-5p     | 0                  | 17         | 2.7         |
| ssc-miR-novel-291 | 94                 | 17         | 3.85        | ssc-miR-301       | 6                  | 27         | 2.31        |
| ssc-miR-novel-293 | 71                 | 9          | 4.26        | ssc-miR-331-3p    | 252                | 704        | 2.73        |
| ssc-miR-novel-294 | 68                 | 16         | 3           | ssc-miR-361-5p    | 0                  | 11         | 2.1         |
| ssc-miR-novel-316 | 55                 | 22         | 2.03        | ssc-miR-369       | 3                  | 38         | 3.7         |
| ssc-miR-novel-320 | 24                 | 7          | 2           | ssc-miR-421-3p    | 845                | 2493       | 2.93        |
|                   |                    |            |             | ssc-miR-423-5p    | 47                 | 472        | 8.46        |
|                   |                    |            |             | ssc-miR-499-5p    | 32                 | 79         | 2.12        |
|                   |                    |            |             | ssc-miR-505       | 453                | 1446       | 3.14        |
|                   |                    |            |             | ssc-miR-542-3p    | 466                | 2376       | 5.01        |
|                   |                    |            |             | ssc-miR-98        | 3                  | 52         | 4.77        |
|                   |                    |            |             | ssc-miR-novel-4   | 1                  | 547        | 50.64       |
|                   |                    |            |             | ssc-miR-novel-10  | 0                  | 47         | 5.7         |
|                   |                    |            |             | ssc-miR-novel-17  | 1                  | 14         | 2.18        |
|                   |                    |            |             | ssc-miR-novel-19  | 8                  | 99         | 6.06        |
|                   |                    |            |             | ssc-miR-novel-61  | 23                 | 58         | 2.06        |
|                   |                    |            |             | ssc-miR-novel-69  | 2                  | 24         | 2.83        |
|                   |                    |            |             | ssc-miR-novel-73  | 5                  | 80         | 6           |
|                   |                    |            |             | ssc-miR-novel-99  | 22                 | 57         | 2.09        |
|                   |                    |            |             | ssc-miR-novel-116 | 3                  | 19         | 2.23        |
|                   |                    |            |             | ssc-miR-novel-132 | 4                  | 30         | 2.86        |
|                   |                    |            |             | ssc-miR-novel-133 | 136                | 362        | 2.55        |
|                   |                    |            |             | ssc-miR-novel-134 | 7                  | 92         | 6           |
|                   |                    |            |             | ssc-miR-novel-135 | 4                  | 30         | 2.86        |
|                   |                    |            |             | ssc-miR-novel-150 | 1                  | 58         | 6.18        |
|                   |                    |            |             | ssc-miR-novel-177 | 3                  | 34         | 3.38        |
|                   |                    |            |             | ssc-miR-novel-193 | 25                 | 199        | 5.97        |
|                   |                    |            |             | ssc-miR-novel-200 | 0                  | 736        | 74.37       |
|                   |                    |            |             | ssc-miR-novel-202 | 1                  | 51         | 5.55        |
|                   |                    |            |             | ssc-miR-novel-212 | 1                  | 16         | 2.36        |
|                   |                    |            |             | ssc-miR-novel-217 | 3                  | 150        | 12.31       |
|                   |                    |            |             | ssc-miR-novel-218 | 1                  | 25         | 3.18        |
|                   |                    |            |             | ssc-miR-novel-220 | 0                  | 28         | 3.8         |
|                   |                    |            |             | ssc-miR-novel-227 | 11                 | 171        | 8.62        |
|                   |                    |            |             | ssc-miR-novel-266 | 37                 | 424        | 9.23        |
|                   |                    |            |             | ssc-miR-novel-269 | 1                  | 20         | 2.73        |
|                   |                    |            |             | ssc-miR-novel-280 | 376                | 1773       | 4.62        |

Table S2. *Cont.*

| miRNA        | Reads in Libraries |            | Fold Change | miRNA           | Reads in Libraries |            | Fold Change |
|--------------|--------------------|------------|-------------|-----------------|--------------------|------------|-------------|
|              | Infected           | Uninfected |             |                 | Infected           | Uninfected |             |
| Up-Regulated |                    |            |             | Down-Regulated  |                    |            |             |
|              |                    |            |             | Down-regulated  | 3                  | 27         | 2.85        |
|              |                    |            |             | ssc-let-7d-5p   | 7                  | 92         | 6           |
|              |                    |            |             | ssc-miR-1285    | 6                  | 87         | 6.06        |
|              |                    |            |             | ssc-miR-143-3p  | 25                 | 62         | 2.06        |
|              |                    |            |             | ssc-miR-145-5p  | 48                 | 156        | 2.91        |
|              |                    |            |             | ssc-miR-155-5p  | 54                 | 812        | 12.84       |
|              |                    |            |             | ssc-miR-15a     | 0                  | 15         | 2.5         |
|              |                    |            |             | ssc-miR-15b     | 372                | 1621       | 4.27        |
|              |                    |            |             | ssc-miR-17-3p   | 76                 | 9541       | 111.06      |
|              |                    |            |             | ssc-miR-185     | 3                  | 27         | 2.85        |
|              |                    |            |             | ssc-miR-18a     | 45                 | 192        | 3.67        |
|              |                    |            |             | ssc-miR-194b-5p | 2590               | 6339       | 2.44        |
|              |                    |            |             | ssc-miR-195     | 2                  | 31         | 3.42        |
|              |                    |            |             | ssc-miR-19a     | 50                 | 114        | 2.07        |
|              |                    |            |             | ssc-miR-215     | 286                | 10,251     | 34.67       |
|              |                    |            |             | ssc-miR-2320-5p | 17                 | 63         | 2.7         |
|              |                    |            |             | ssc-miR-24-3p   | 82                 | 232        | 2.63        |
|              |                    |            |             | ssc-miR-27b-5p  | 0                  | 17         | 2.7         |
|              |                    |            |             | ssc-miR-28-5p   | 6                  | 27         | 2.31        |
|              |                    |            |             | ssc-miR-301     | 252                | 704        | 2.73        |
|              |                    |            |             | ssc-miR-331-3p  | 0                  | 11         | 2.1         |
|              |                    |            |             | ssc-miR-361-5p  | 3                  | 38         | 3.7         |
|              |                    |            |             | ssc-miR-369     | 845                | 2493       | 2.93        |
